# Supplementary figures and images for: Living Well: An Intervention to Improve Medical Illness Self-Management Among Individuals With Serious Mental Illness
Source: Atypon-hosted journal article supplement (doi:10.1176/appi.ps.201800162), 2018-10-24

Online supplement . CONSORT Diagram

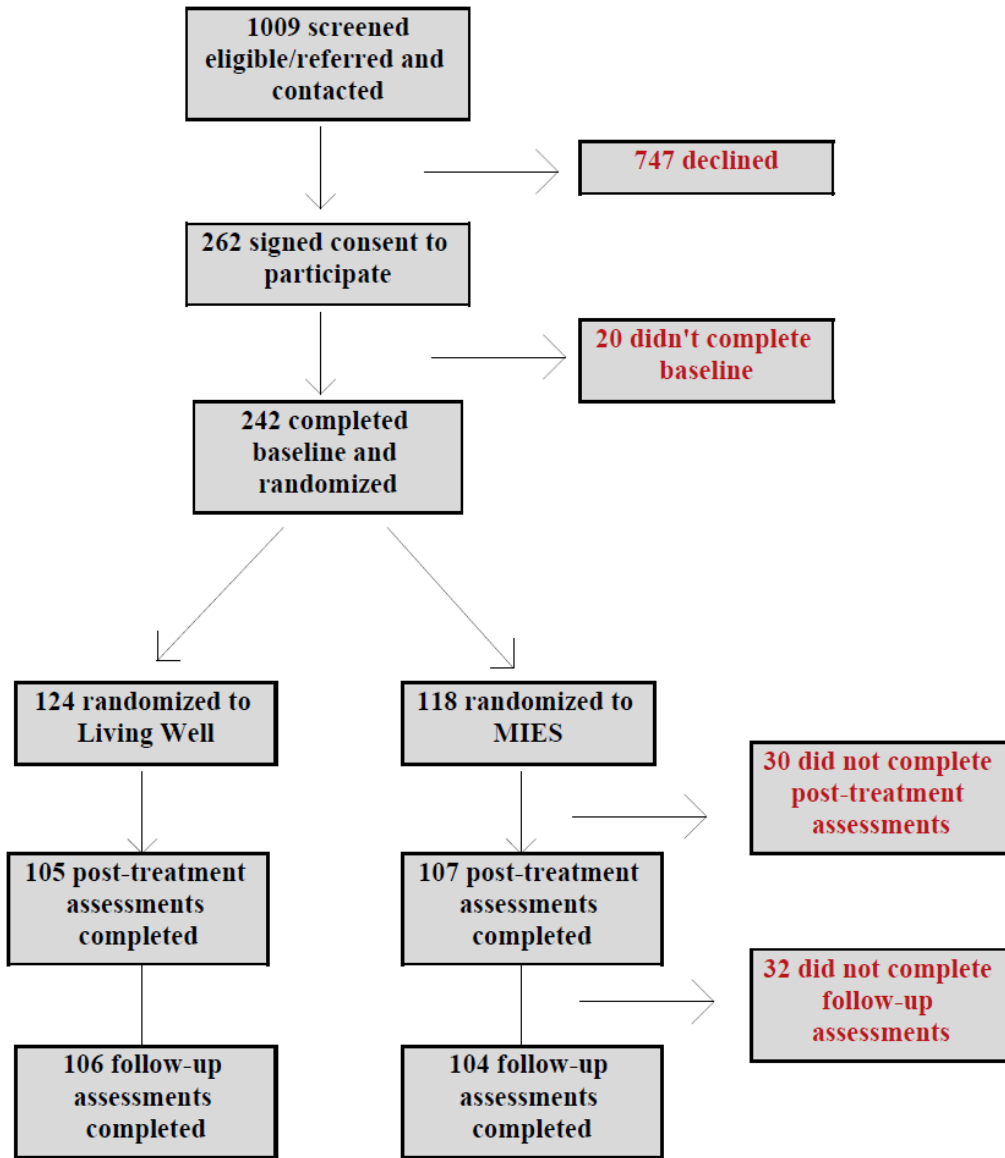

Supplement: appi.ps.201800162.ds001.pdf [file appi.ps.201800162.ds001.pdf]
